# Supplementary material
Source: Royal Society of Chemistry journal article supplement (doi:10.1039/d6qm00245e)
Supplement: d6qm00245e3.pdf [file d6qm00245e3.pdf]

## Supplementary Information

### Tb<sup>3+</sup>-Tuned Afterglow in CDs@Al<sub>2</sub>O<sub>3</sub> for Dynamic Information Encryption and Slow-Fade Indicators

Fei Zhou<sup>a</sup>, Hangqing Xie<sup>a\*</sup>, Pengfei Wu<sup>b</sup>, Jing Xu<sup>c</sup>, Ying Tian<sup>a</sup>, Jipeng Fu<sup>a</sup>, Shiqing

Xu<sup>a, d</sup>

a. Key Laboratory of Rare Earth Optoelectronic Materials and Devices of Zhejiang Province, College of Optical and Electronic Technology, China Jiliang University, Hangzhou 310018, China

b. Petrochemical Research Institute, PetroChina Company Limited, Beijing 102206, China

c. School of Mechanical Engineering, Hangzhou Dianzi University, Hangzhou, 310018, China

d. Hangzhou City University, Hangzhou 310015, China

\*Corresponding author.

Email: xiehq-hz@cjlu.edu.cn (Hangqing Xie)

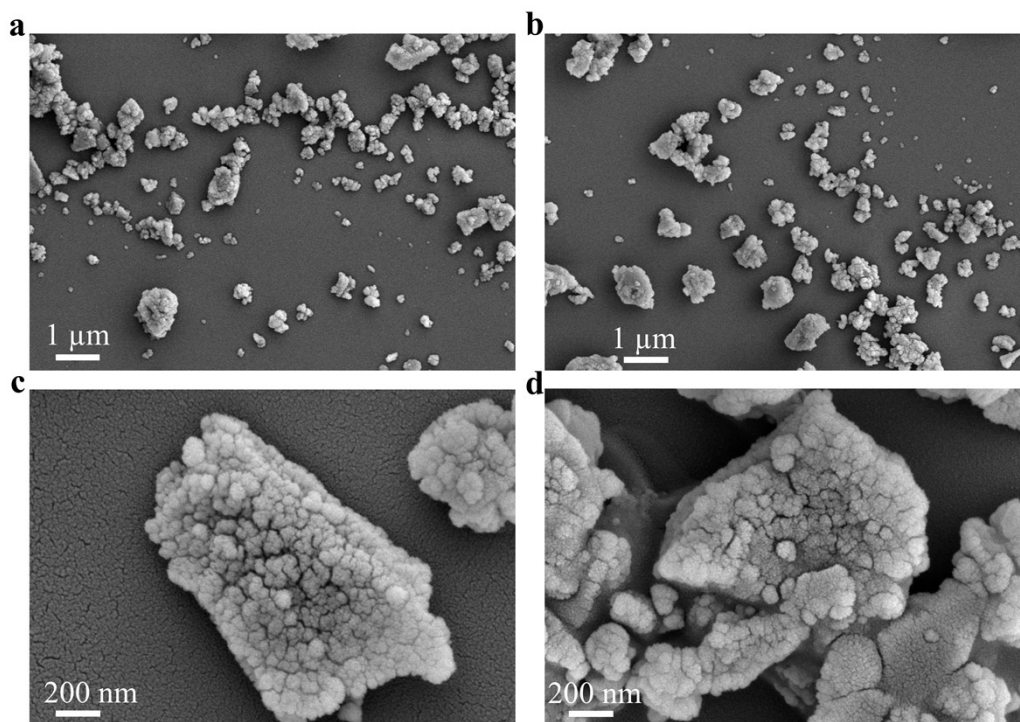

**Fig. S1.** Comparative SEM images of CDs@Al<sub>2</sub>O<sub>3</sub> and Tb-3-CDs@Al<sub>2</sub>O<sub>3</sub> recorded at matched magnifications. (a, c) CDs@Al<sub>2</sub>O<sub>3</sub>; (b, d) Tb-3-CDs@Al<sub>2</sub>O<sub>3</sub>. Panels (a, b) show low-magnification SEM images, while panels (c, d) show the corresponding high-magnification SEM images.

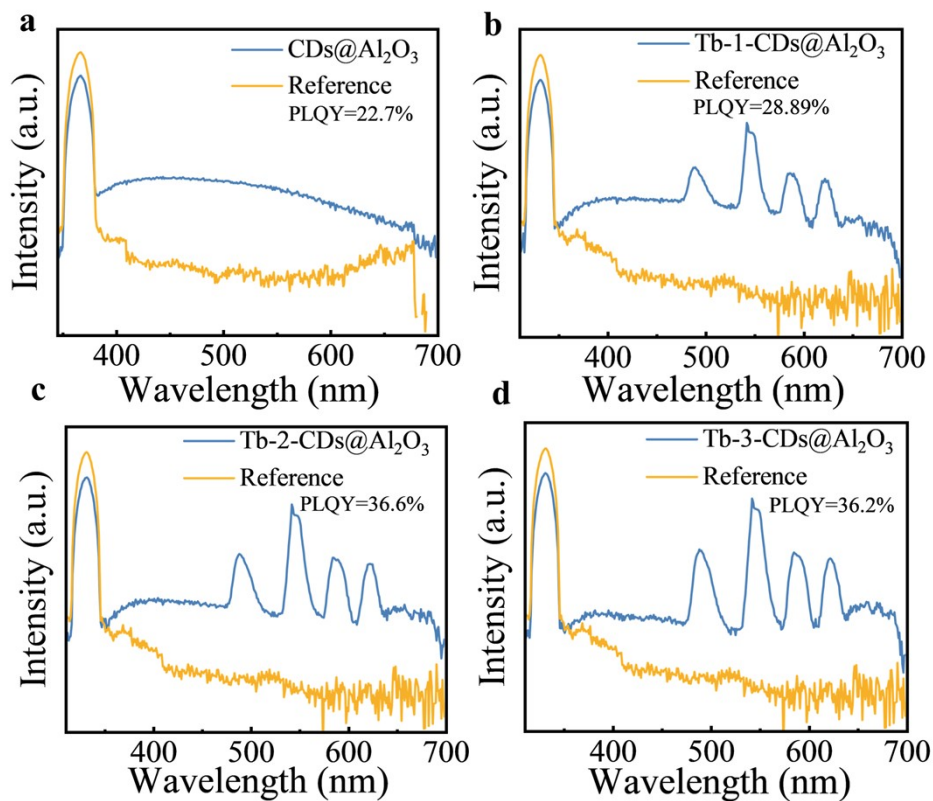

**Fig. S2.** PLQY measurement spectra of (a)  $\text{CDs@Al}_2\text{O}_3$ , (b)  $\text{Tb-1-CDs@Al}_2\text{O}_3$ , (c)  $\text{Tb-2-CDs@Al}_2\text{O}_3$ , and (d)  $\text{Tb-3-CDs@Al}_2\text{O}_3$ .

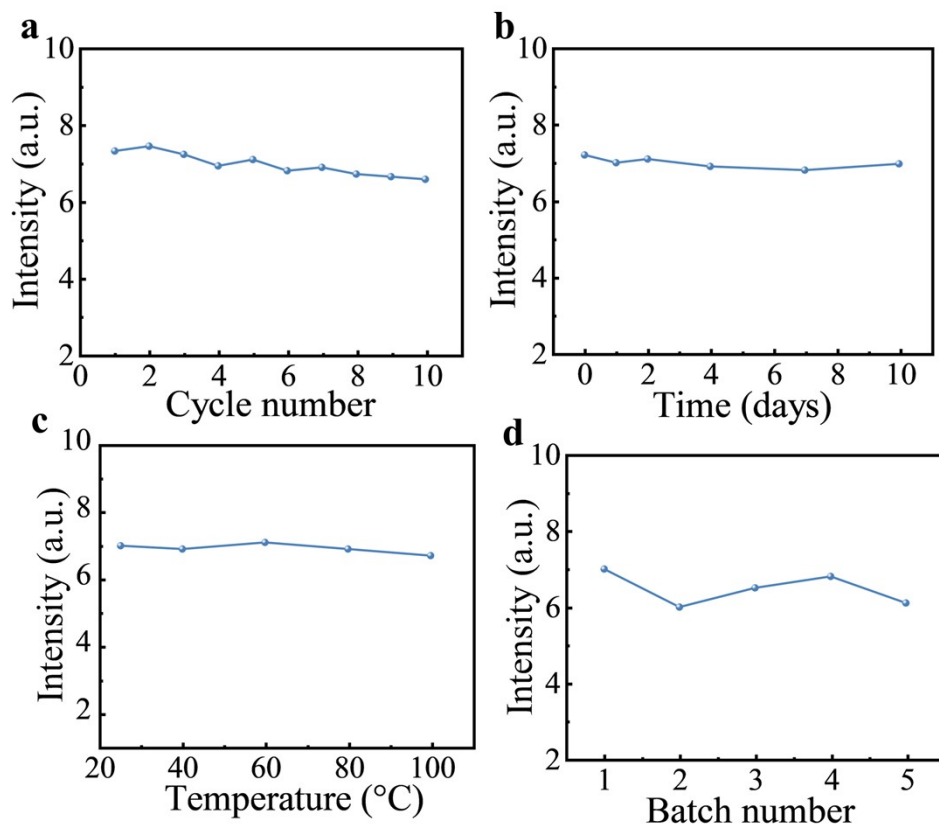

**Fig. S3.** PL stability and reproducibility of  $\text{Tb-2-CDs@Al}_2\text{O}_3$  monitored by the  $\text{Tb}^{3+}$

emission at 544 nm under 360 nm excitation: (a) repeated-excitation cycles; (b) 10-day storage; (c) thermal treatment at 25-100 °C; and (d) reproducibility across five batches.

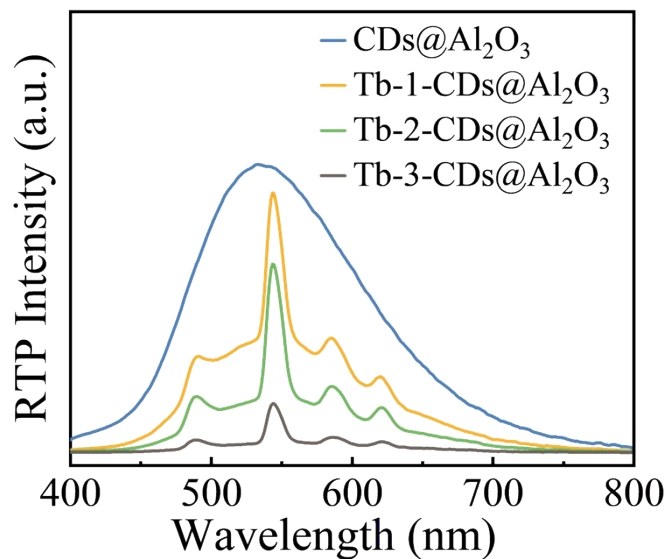

**Fig. S4.** Delayed emission spectra of CDs@Al<sub>2</sub>O<sub>3</sub> and Tb-x-CDs@Al<sub>2</sub>O<sub>3</sub> recorded with a delay time of 1 ms.

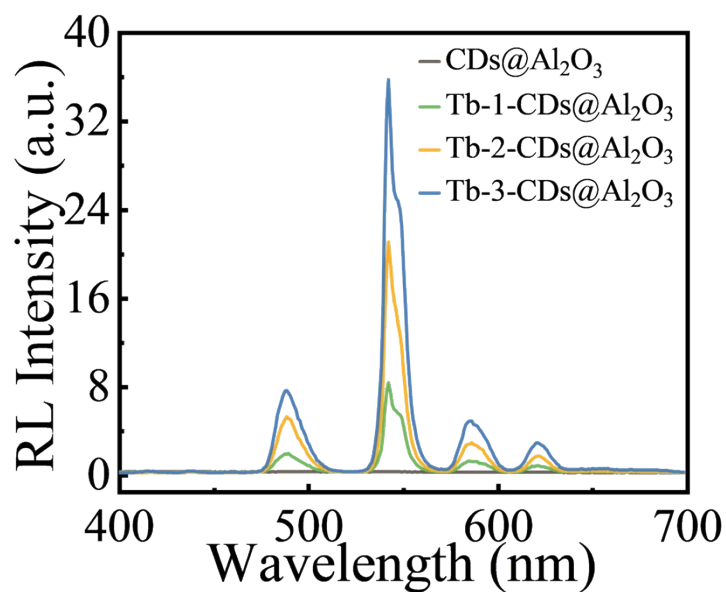

**Fig. S5.** X-ray-excited luminescence spectra of CDs@Al<sub>2</sub>O<sub>3</sub> and Tb-x-CDs@Al<sub>2</sub>O<sub>3</sub>.

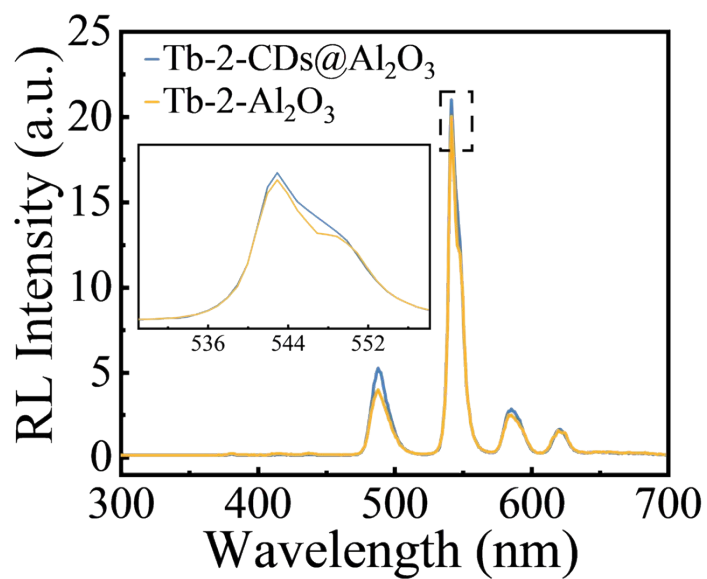

**Fig. S6.** X-ray-excited luminescence spectra of Tb-2-CDs@Al<sub>2</sub>O<sub>3</sub> and Tb-2-Al<sub>2</sub>O<sub>3</sub>.

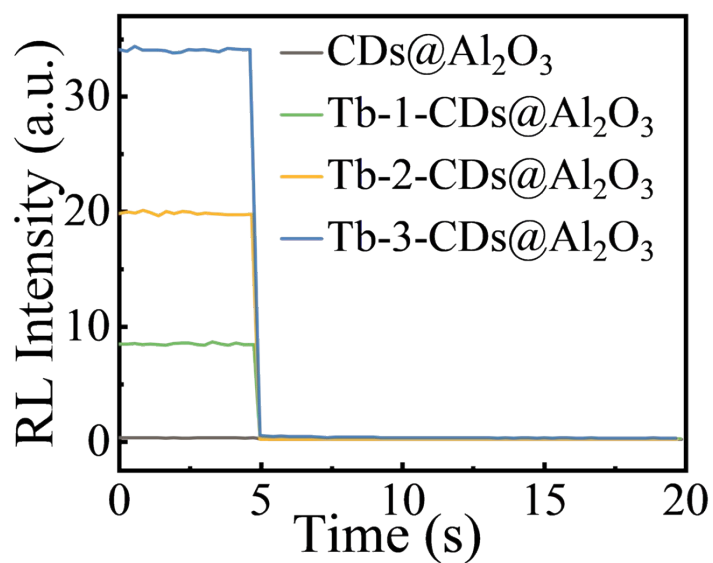

**Fig. S7.** Time-dependent X-ray-excited luminescence intensity of CDs@Al<sub>2</sub>O<sub>3</sub> and Tb-x-CDs@Al<sub>2</sub>O<sub>3</sub> before and after the X-ray source was switched off.

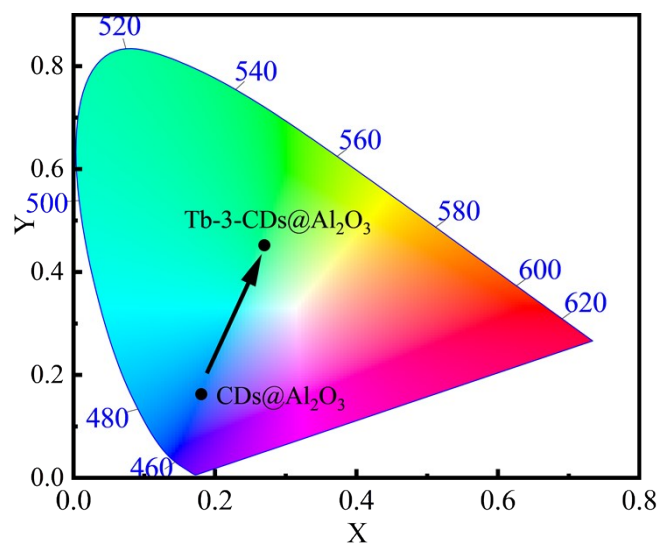

**Fig. S8.** CIE 1931 chromaticity diagram of the fluorescence emission colors of  $\text{CDs@Al}_2\text{O}_3$  and  $\text{Tb-3-CDs@Al}_2\text{O}_3$ .

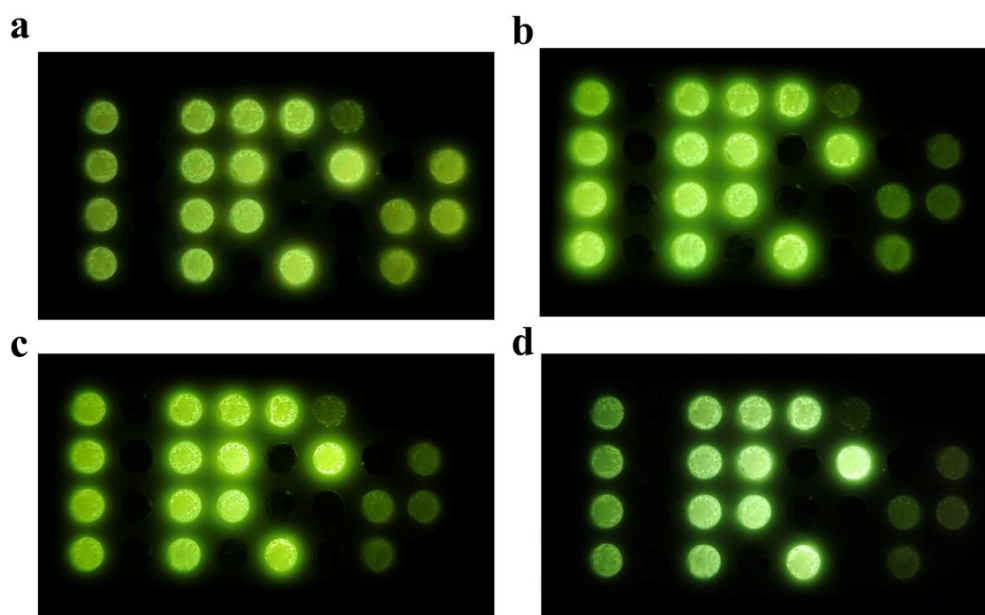

**Fig. S9.** Repeated photographic readouts of the same encryption matrix recorded at 1 s after UV off under consistent photographic conditions: (a-d) four independent measurements showing similar luminescence patterns and the same decoded output.

**Table S1.** Actual Tb contents of Tb-x-CDs@Al<sub>2</sub>O<sub>3</sub> determined by ICP-OES.

| Sample                                  | Actual Tb content (wt%) |
|-----------------------------------------|-------------------------|
| Tb-1-CDs@Al <sub>2</sub> O <sub>3</sub> | 2.028 ± 0.014           |
| Tb-2-CDs@Al <sub>2</sub> O <sub>3</sub> | 3.709 ± 0.011           |
| Tb-3-CDs@Al <sub>2</sub> O <sub>3</sub> | 4.796 ± 0.014           |

Values are presented as mean ± standard deviation based on three parallel ICP-OES measurements.

**Table S2.** Emission decay lifetimes of CDs@Al<sub>2</sub>O<sub>3</sub> and Tb-x-CDs@Al<sub>2</sub>O<sub>3</sub>.

| Sample                                  | lifetime at 415 nm (ns) | lifetime at 544 nm (ms) | RTP lifetime at 534 nm (s) |
|-----------------------------------------|-------------------------|-------------------------|----------------------------|
| CDs@Al <sub>2</sub> O <sub>3</sub>      | 5.20                    | —                       | 1.20                       |
| Tb-1-CDs@Al <sub>2</sub> O <sub>3</sub> | 5.10                    | 1.889                   | 1.08                       |
| Tb-2-CDs@Al <sub>2</sub> O <sub>3</sub> | 4.92                    | 1.930                   | 0.95                       |
| Tb-3-CDs@Al <sub>2</sub> O <sub>3</sub> | 4.35                    | 1.861                   | 0.82                       |

**Table S3.** Lifetime-Derived Apparent ET Efficiency

| Sample                                  | $\tau_{RTP}$ (s) | $\eta_{ET}$ (%) |
|-----------------------------------------|------------------|-----------------|
| CDs@Al <sub>2</sub> O <sub>3</sub>      | 1.20             | 0               |
| Tb-1-CDs@Al <sub>2</sub> O <sub>3</sub> | 1.08             | 10              |
| Tb-2-CDs@Al <sub>2</sub> O <sub>3</sub> | 0.95             | 20.8            |
| Tb-3-CDs@Al <sub>2</sub> O <sub>3</sub> | 0.82             | 31.7            |

The lifetime-derived apparent energy-transfer efficiency from the CDs triplet state was estimated according to:

$$\eta_{ET} = 1 - \frac{\tau_{DA}}{\tau_D}$$

where  $\tau_D$  is the RTP lifetime of CDs@Al<sub>2</sub>O<sub>3</sub>, and  $\tau_{DA}$  is the RTP lifetime of Tb-x-CDs@Al<sub>2</sub>O<sub>3</sub> at a given nominal Tb<sup>3+</sup> loading.
